# Supplementary material for: Activity against Mycobacterium tuberculosis of a new class of spirooxindolopyrrolidine embedded chromanone hybrid heterocycles
Source: Royal Society of Chemistry journal article supplement (doi:10.1039/d4ra01501k), 2024-01-01
Supplement: d4ra01501k1.pdf [file d4ra01501k1.pdf]

## **Supplementary Information**

### **Activity against *Mycobacterium tuberculosis* of a new class of spirooxindolopyrrolidine embedded chromanone hybrid heterocycles**

Manal Fahad Alkaltham,<sup>a</sup> Abdulrahman I. Almansour,<sup>a</sup> Natarajan Arumugam,<sup>a\*</sup> Siva Krishna Vagolu<sup>b,c\*</sup>, Tone Tønjum<sup>b,c</sup> Shatha Ibrahim Alaqeel,<sup>d</sup> Sai Swaroop Rajaratnam,<sup>e</sup> Venkatesh Sivaramakrishnan,<sup>e</sup>

<sup>a</sup> Department of Chemistry, College of Science, King Saud University, P.O. Box 2455, Riyadh 11451, Saudi Arabia

<sup>b</sup> Department of Microbiology, University of Oslo, N-0316 Oslo, Norway

<sup>c</sup> Department of Microbiology, Oslo University Hospital, N-0424 Oslo, Norway

<sup>d</sup> Department of Chemistry, College of Science, King Saud University (034), Riyadh 11495, Saudi Arabia

<sup>e</sup> *Disease Biology Lab, Department of Biosciences, Sri Sathya Sai Institute of Higher Learning, Prasanthi Nilayam, Anantapur, Andhra Pradesh, India*

---

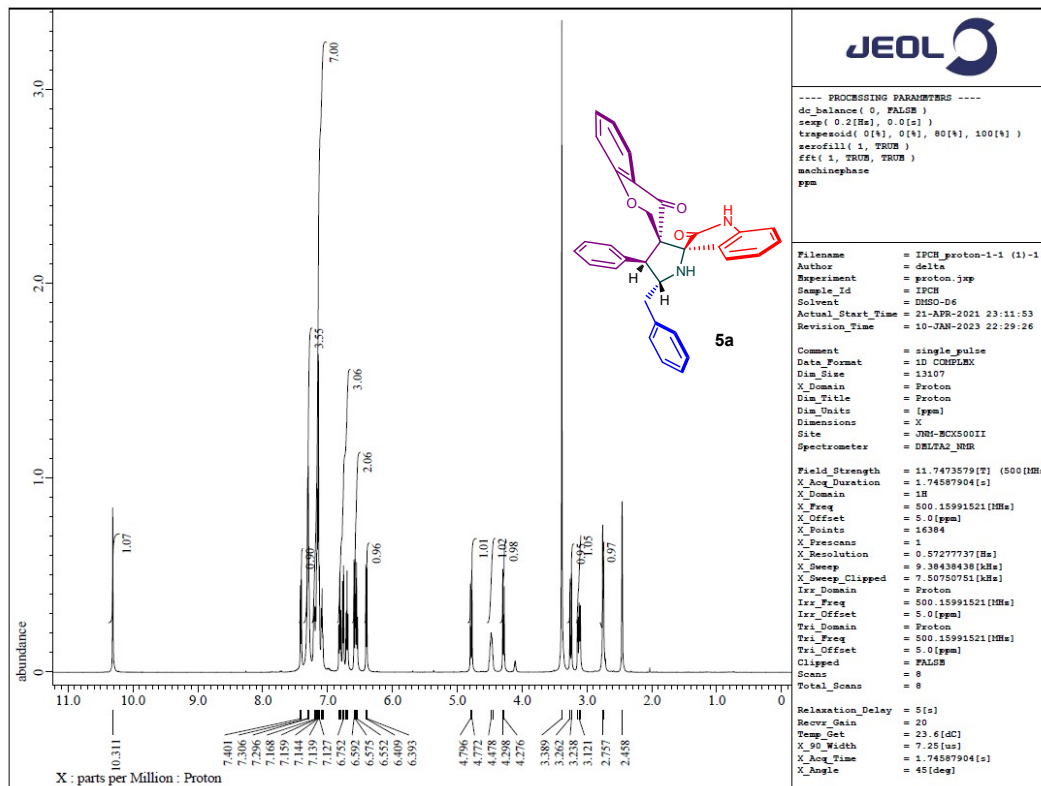

Figure S1. <sup>1</sup>H NMR spectrum of 5a

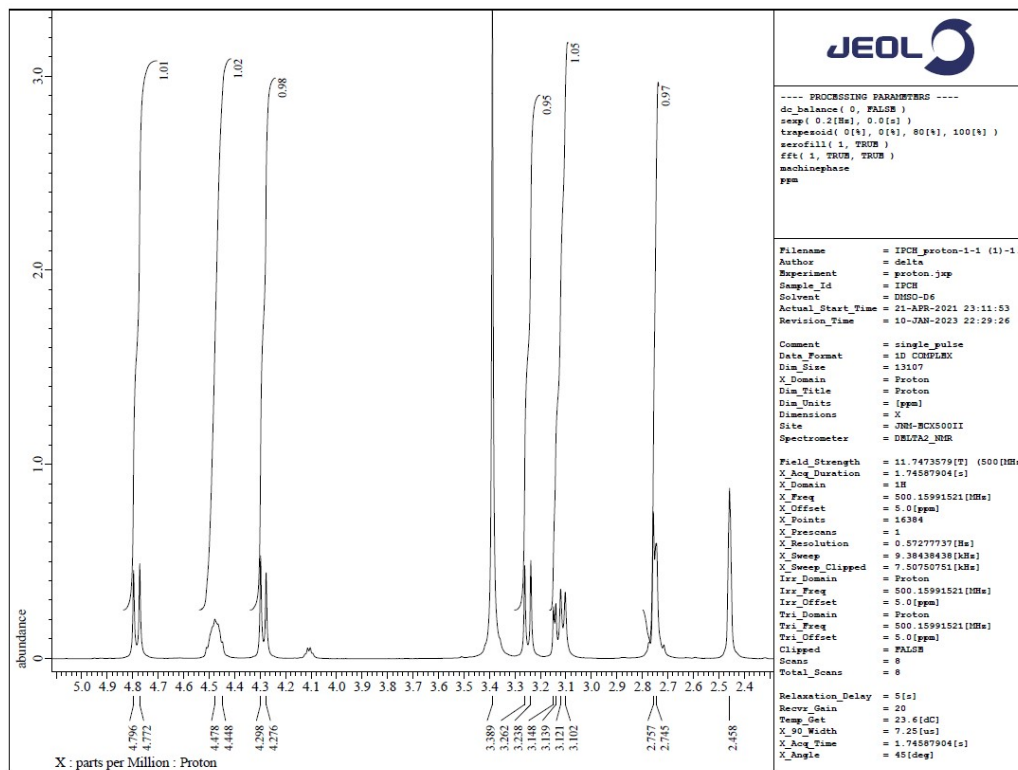

Figure S2. Expanded <sup>1</sup>H NMR spectrum of 5a

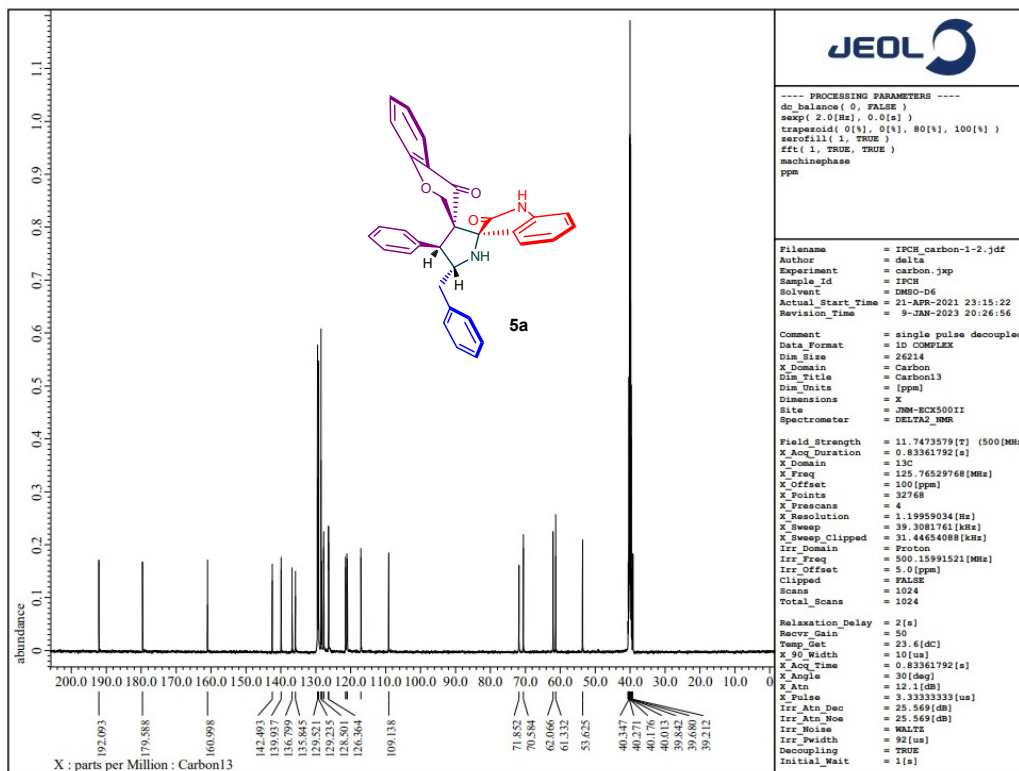

Figure S3. <sup>13</sup>C NMR spectrum of 5a

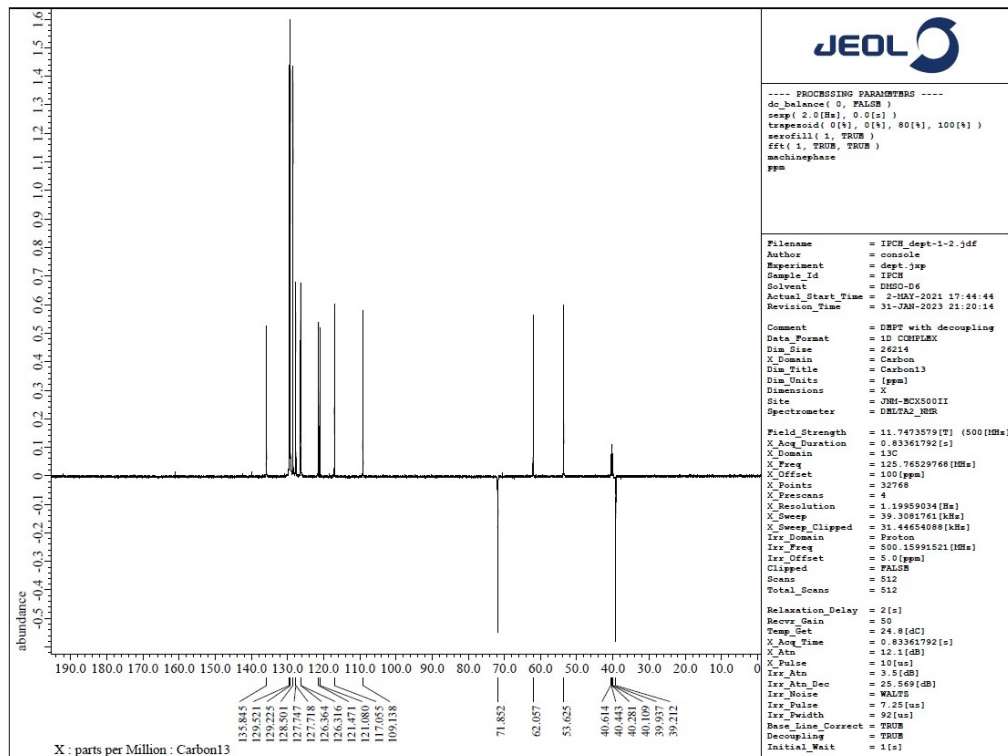

Figure S4. DEPT-135 spectrum of 5a

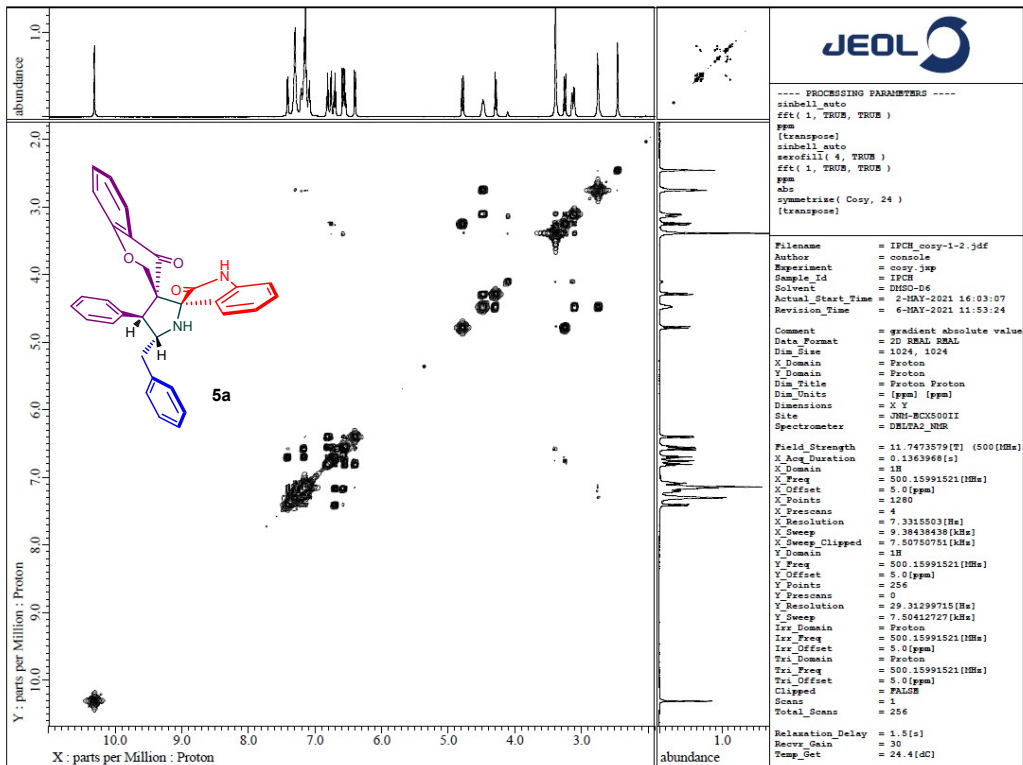

Figure S5.  $^1\text{H}$ ,  $^1\text{H}$ -COSY spectrum of **5a**

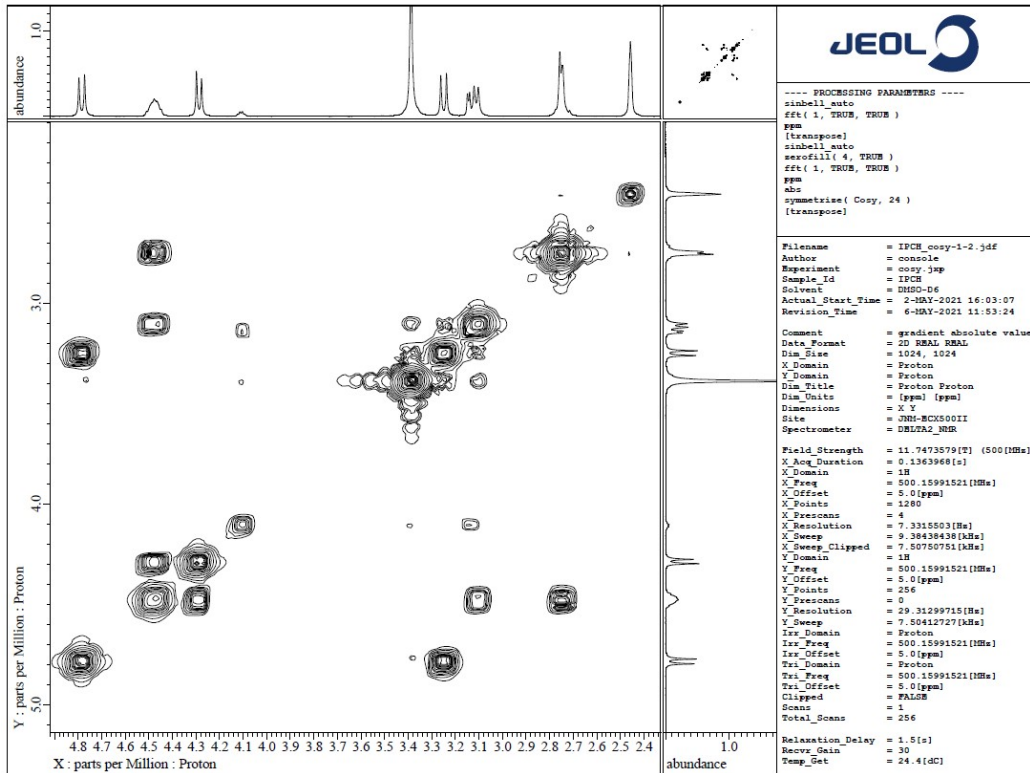

Figure S6. Expanded  $^1\text{H}$ ,  $^1\text{H}$ -COSY Expansion spectrum of **5a**

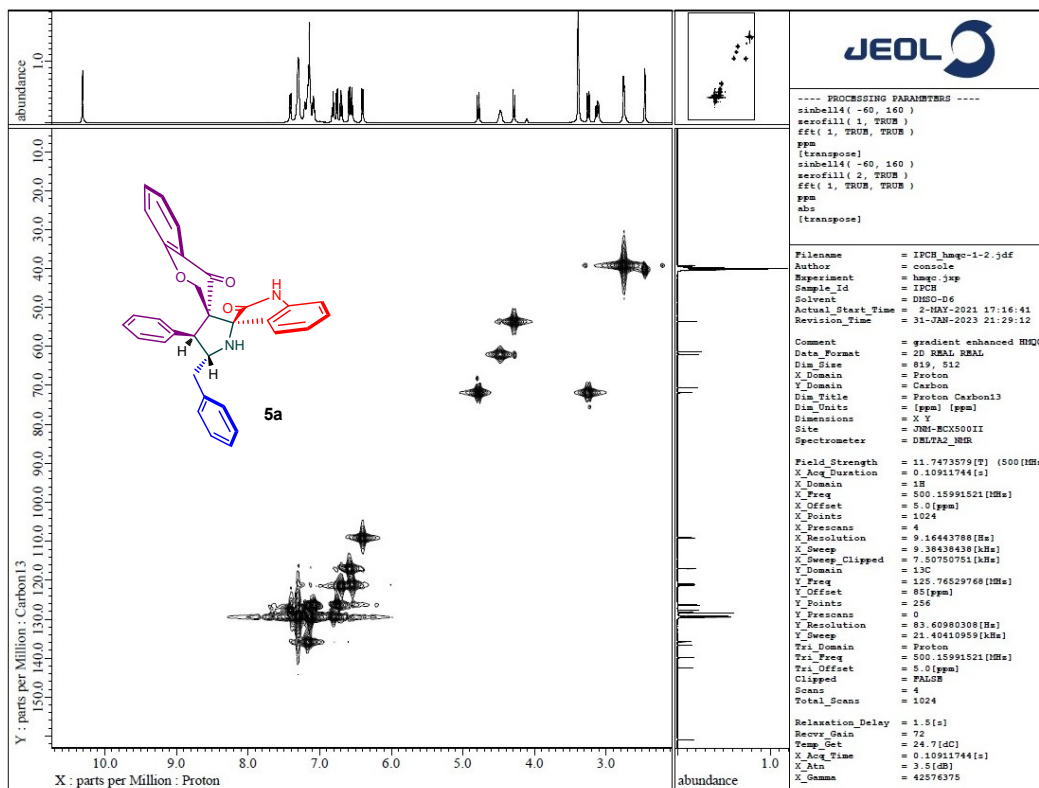

Figure S7.  $^{13}\text{C}$ , H-COSY (HMQC) Expansion spectrum of **5a**

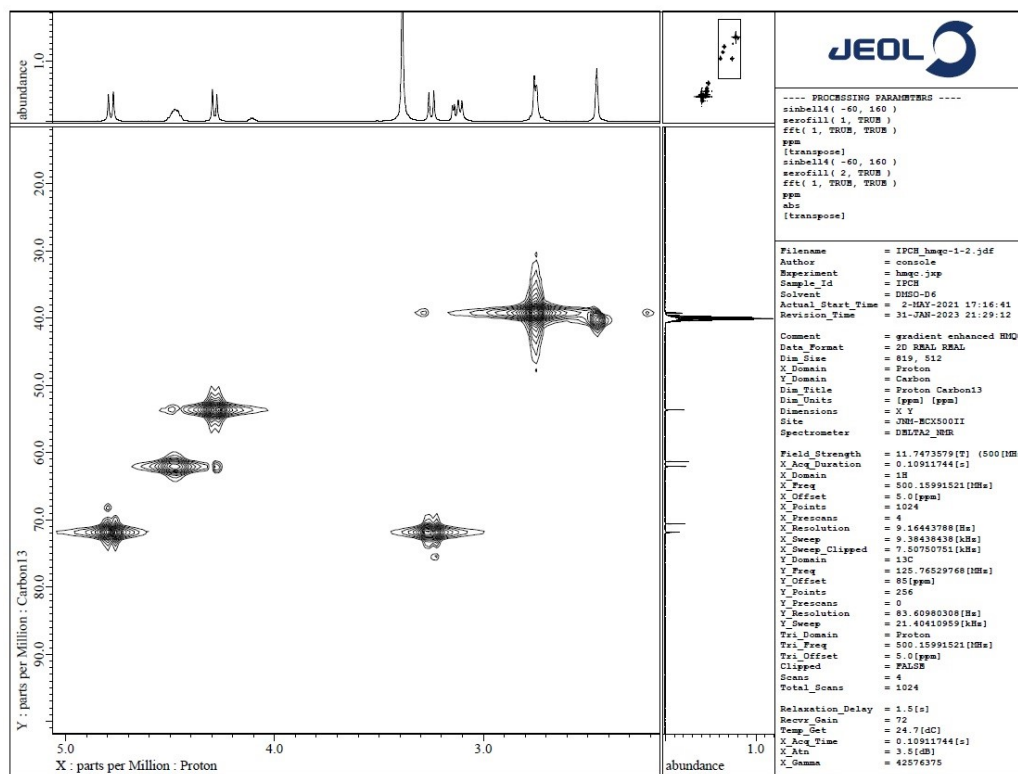

Figure S8. Expanded  $^{13}\text{C}$ , H-COSY (HMQC) Expansion spectrum of **5a**



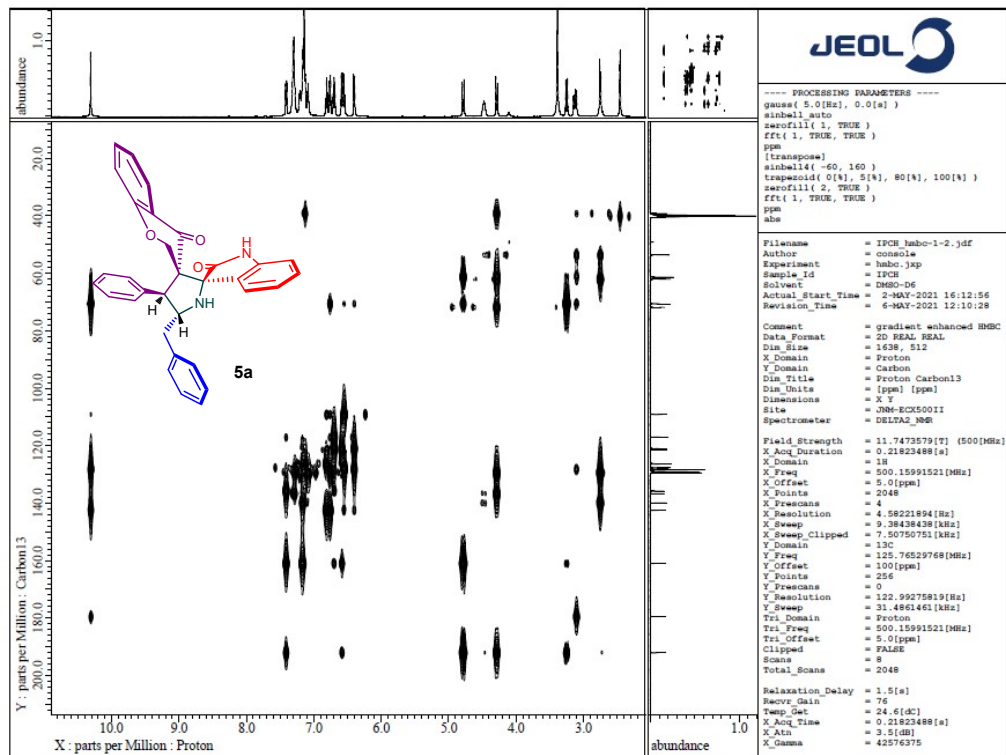

Figure S9. HMBC spectrum of 5a

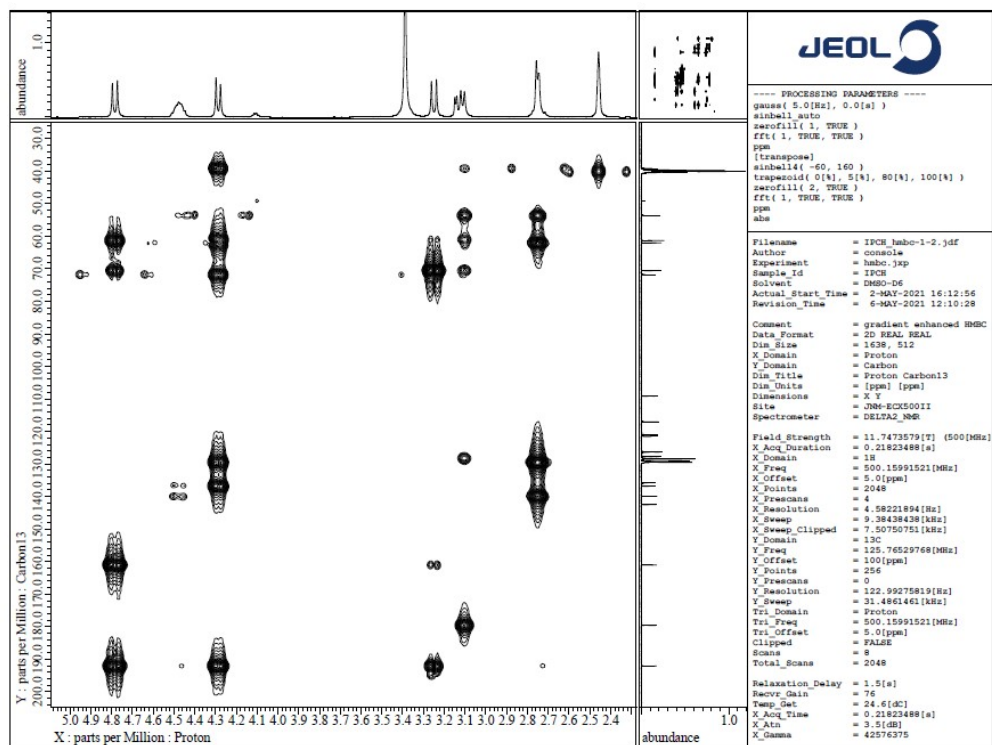

Figure S10. Expanded HMBC spectrum of 5a

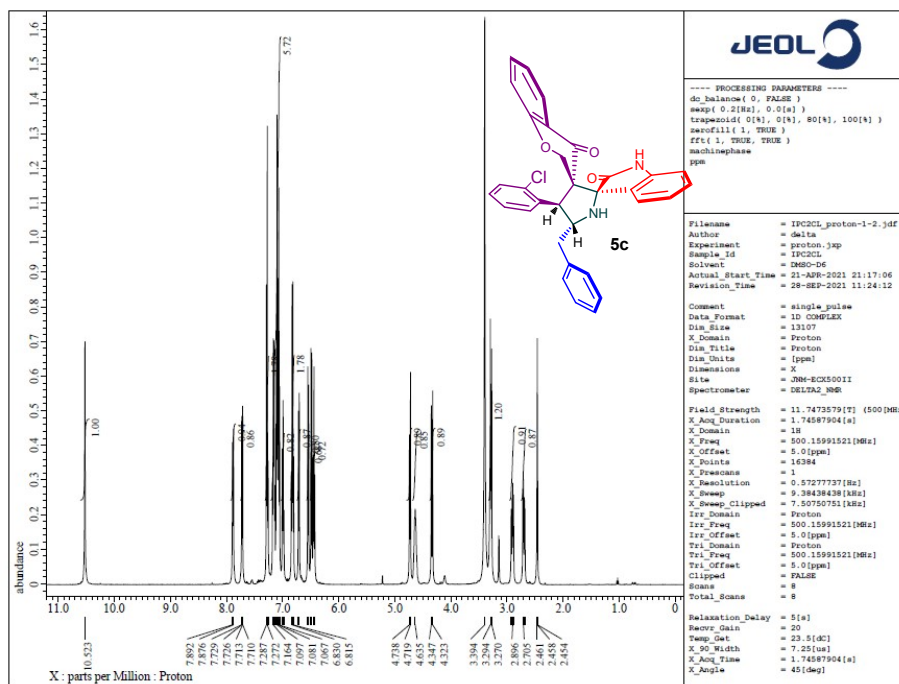

Figure S11.  $^1\text{H}$  NMR spectrum of **5c**

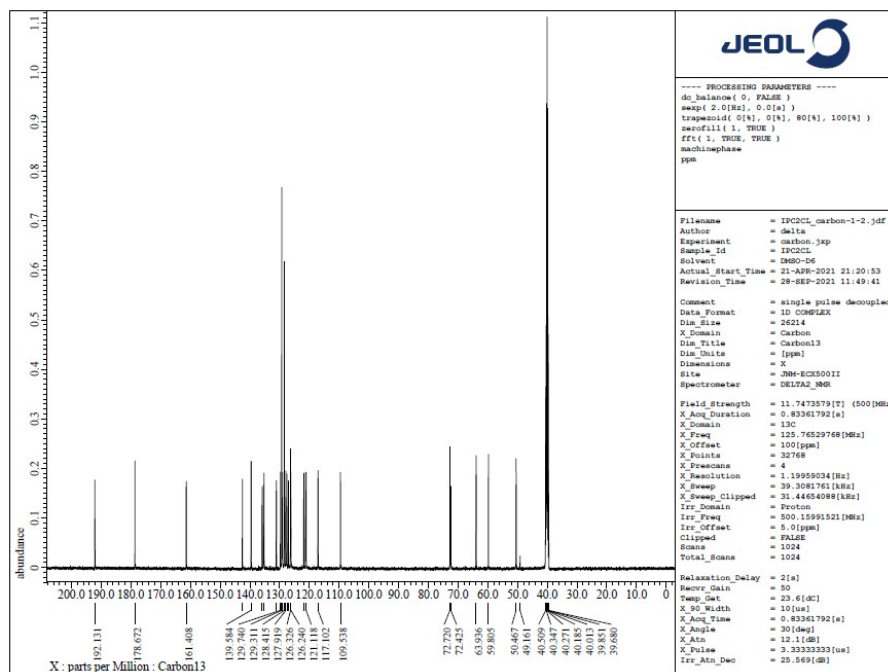

Figure S12.  $^{13}\text{C}$  NMR spectrum of **5c**

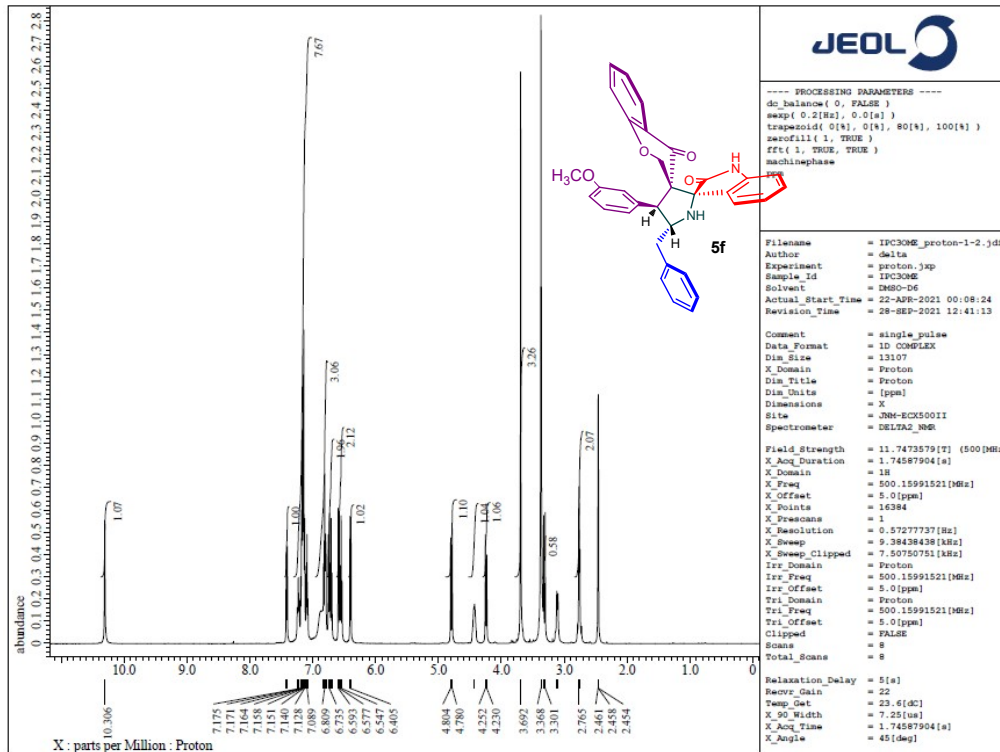

Figure S13. <sup>1</sup>H NMR spectrum of 5f

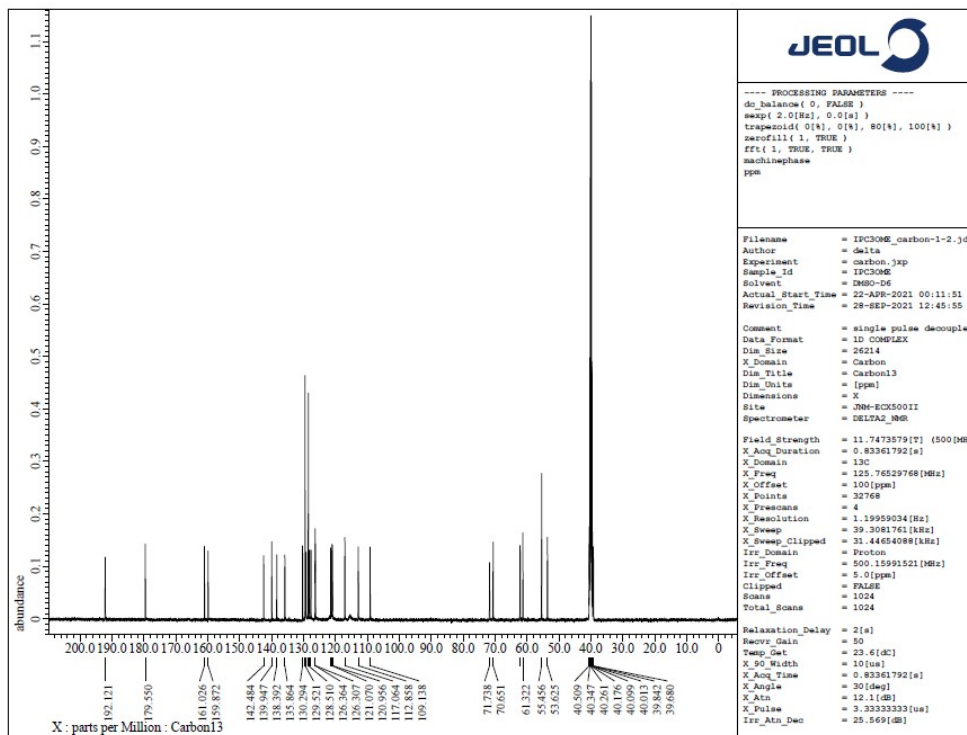

Figure S13. <sup>13</sup>C NMR spectrum of 5f



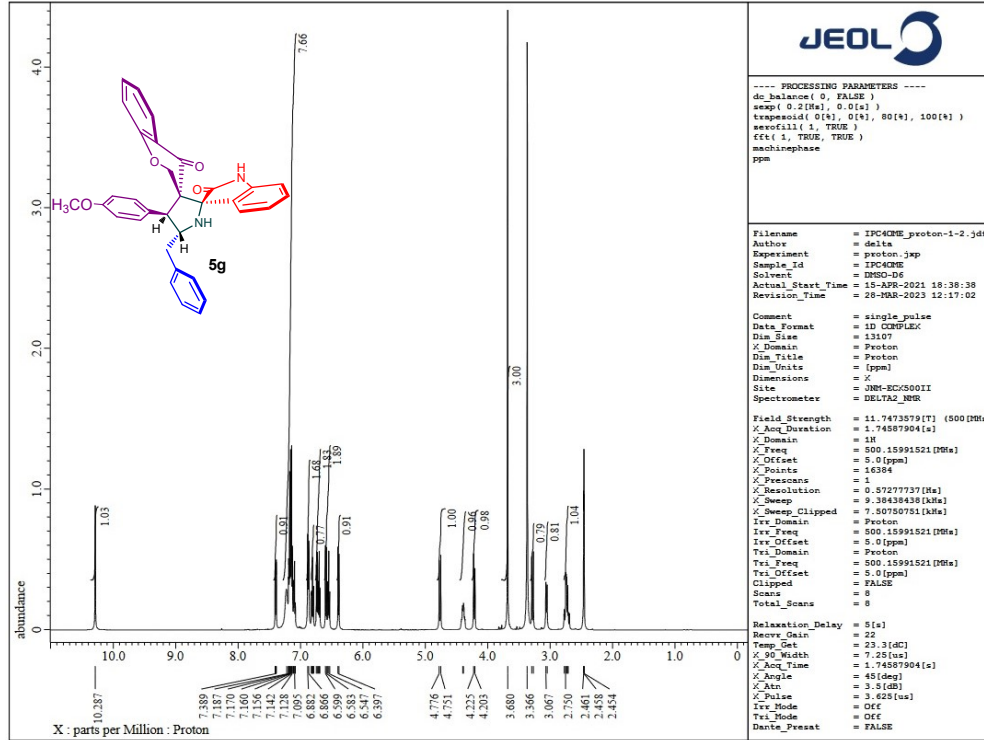

Figure S11. <sup>1</sup>H NMR spectrum of 5g

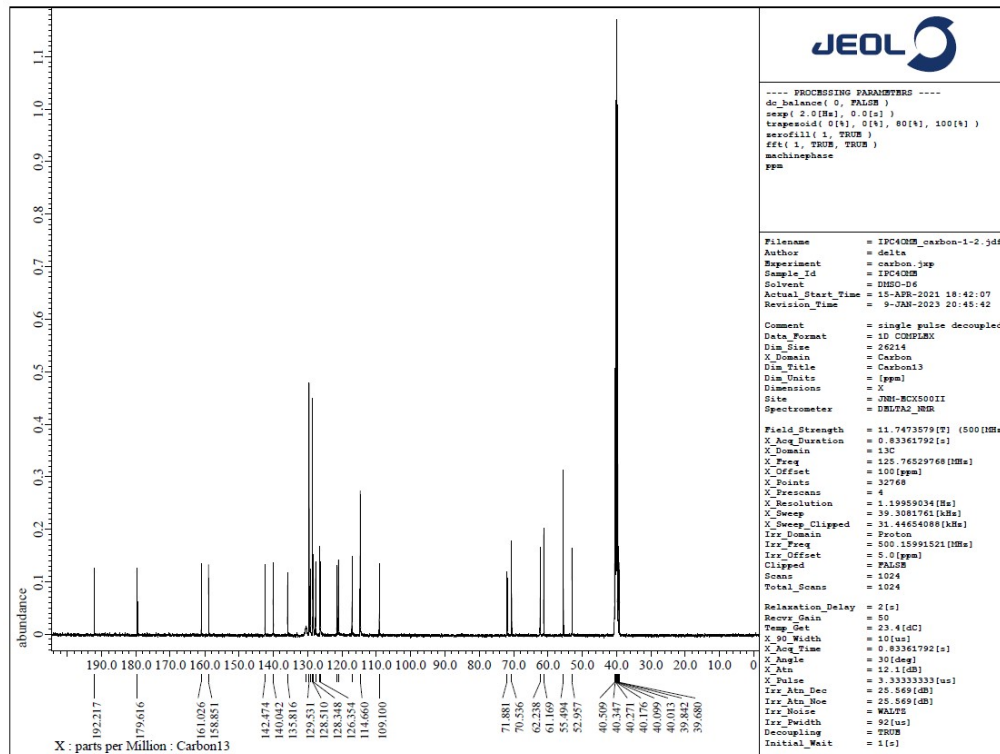

Figure S12. <sup>13</sup>C NMR spectrum of 5g

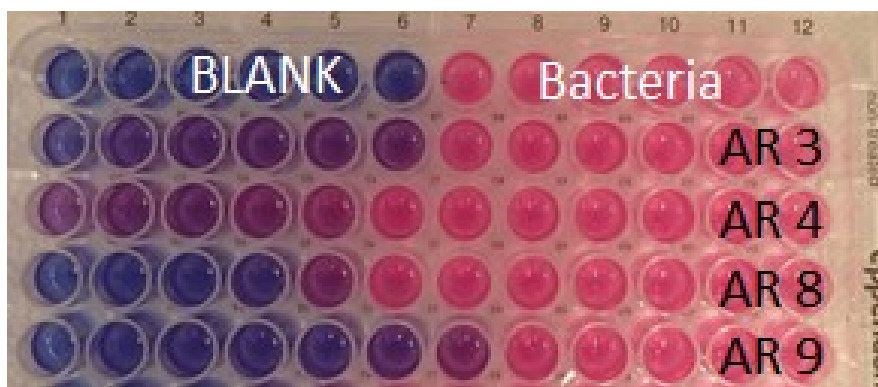

**Figure S13:** Culture media plates of *Mycobacterium tuberculosis* for the Anti-*Mycobacterium tuberculosis* activity of spiropyrrolidine heterocyclic hybrids (AR3-9 represent as compound **5c**, **5d**, **5h** and **5i**)

### Spectral discussion

The structure of compounds agreed with their 1D and 2D NMR spectroscopic analysis as evidenced for a representative compound **5a**. The IR spectrum of **5a** showed peaks at 1717 and 1687  $\text{cm}^{-1}$  belonging to oxindole and chromanone carbonyl stretching frequency. In the  $^1\text{H}$  NMR spectrum of **5a**, the doublet at  $\delta$  4.29 ( $J = 11.0$  Hz) ppm was assigned to benzylic hydrogen (H-4) of the pyrrolidine ring which showed (i) H, H-COSY correlation with the multiplets at  $\delta$  4.44-4.48 ppm assignable H-5 hydrogen of pyrrolidine ring (ii) HMBCs with C-3 C-5, C-6 and C-7 at 61.3, 62.1, 39.2 and 71.9 ppm, respectively, besides showing a correlation with chromanone carbonyl at  $\delta$  192.1 ppm. H-5 hydrogen displayed correlation with the multiplets at  $\delta$  2.75-2.76 ppm assignable to H-6 hydrogens which showed (i) HMBCs with C-4 and C-5 at 53.6 and 62.1 ppm (ii) H, H-COSY correlations to each other hydrogens. The chromanone methylene hydrogens (C-7) showed two doublets at  $\delta$  3.43 and 4.78 ( $J=12.0$  Hz) ppm. H-7 hydrogens showed HMBCs with spiro carbon (C-2) and chromanone carbonyl carbon (C-4') at  $\delta$  70.6 and 192.1 ppm. Further, the methine and methylene carbon signal was assigned through DEPT-135 spectrum. The two spiro carbons were undoubtedly assigned through the absence spirocarbon signal in DEPT-135 at  $\delta$  70.6

(C-2) and 61.3 (C-3) ppm. The carbonyl signal was unambiguously assigned through HMQC spectroscopic analysis.

**Compound 5a:** Obtained as white solid (89 %): IR (KBr): 1687, 1717, 3244, 3395, 3030, 1195  $\text{cm}^{-1}$ ;  $^1\text{H}$  NMR (DMSO- $d_6$ , 500 MHz):  $\delta$ /ppm 2.75 (d,  $J = 6.0$  Hz, 1H), 3.10-3.15 (m, 1H), 3.25 (d,  $J = 12.0$  Hz, 1H), 4.29 (d,  $J = 11.0$  Hz, 1H), 4.44-4.48 (m, 1H), 4.78 (d,  $J = 12.0$  Hz, 1H), 6.40 (d,  $J = 8.0$  Hz, 1H, ArH), 6.54-6.59 (m, 2H, ArH), 6.70 (t,  $J = 7.5$  Hz, 1H, ArH), 6.76 (d,  $J = 7.5$  Hz, 1H, ArH), 6.81 (t,  $J = 7.5$  Hz, 1H, ArH), 7.08-7.12 (m, 3H, ArH), 7.13-7.20 (m, 7H, ArH), 7.30-7.31 (m, 1H, ArH), 7.41 (d,  $J = 8.0$  Hz, 1H, ArH), 10.31 (s, 1H, NH);  $^{13}\text{C}$  NMR (DMSO- $d_6$ , 125 MHz):  $\delta$ /ppm 39.2, 53.6, 61.3, 62.1, 70.6, 71.9, 109.1, 117.1, 120.9, 121.1, 121.5, 126.3, 126.4, 127.7, 127.8, 128.5, 129.2, 129.5, 135.8, 136.8, 139.9, 142.5, 160.9, 179.6, 192.1. Mass  $m/z$ : 487 ( $\text{M}^+$ )

**Compound 5b:** Obtained as white solid (94%):  $^1\text{H}$  NMR (DMSO- $d_6$ , 500 MHz):  $\delta$ /ppm 2.74-2.75 (m, 1H), 3.20-3.30 (m, 2H), 4.24 (d,  $J = 10.0$  Hz, 1H), 4.42-4.43 (m, 1H), 4.73 (d,  $J = 12.0$  Hz, 1H), 6.41 (d,  $J = 8.0$  Hz, 1H, ArH), 6.53-6.60 (m, 2H, ArH), 6.70-6.75 (m, 2H, ArH), 6.81 (t,  $J = 7.0$  Hz, 1H, ArH), 7.08-7.24 (m, 7H, ArH), 7.40-7.47 (m, 3H, ArH), 7.62-7.67 (m, 1H, ArH), 10.46 (s, 1H, NH);  $^{13}\text{C}$  NMR (DMSO- $d_6$ , 125 MHz):  $\delta$ /ppm 39.8, 53.0, 61.2, 62.3, 70.6, 71.7, 109.2, 117.1, 118.5, 120.9, 121.1, 121.5, 126.4, 127.7, 128.1, 128.5, 129.3, 129.6, 132.1, 132.3, 132.8, 135.9, 136.3, 139.8, 142.5, 161.0, 179.5, 191.9; Mass  $m/z$ : 565 ( $\text{M}^+$ )

**Compound 5e:** Obtained as white solid (87%):  $^1\text{H}$  NMR (DMSO- $d_6$ , 500 MHz):  $\delta$ /ppm 2.22 (s, 3H), 2.71-2.73 (m, 2H), 3.26 (d,  $J = 12.0$  Hz, 1H), 4.22 (d,  $J = 10.5$  Hz, 1H), 4.41-4.46 (m, 1H), 4.76 (d,  $J = 12.0$  Hz, 1H), 6.38 (d,  $J = 7.5$  Hz, 1H, ArH), 6.53-6.59 (m, 2H, ArH), 6.69-6.74 (m, 2H, ArH), 6.80 (t,  $J = 8.0$  Hz, 1H, ArH), 7.09-7.23 (m, 10H, ArH), 7.37-7.39 (m, 1H, ArH), 10.29 (s, 1H, NH);  $^{13}\text{C}$  NMR (DMSO- $d_6$ , 125 MHz):  $\delta$ /ppm 21.2, 39.8, 53.3, 61.2, 62.1, 70.5, 71.8, 109.1, 117.1, 120.9, 121.0, 121.5, 126.3, 126.4, 127.7, 128.3, 128.5, 128.8, 129.2, 129.5, 129.9, 133.6, 135.8, 136.9, 140.0, 142.5, 160.9, 179.6, 192.1; Mass  $m/z$ : 500 ( $\text{M}^+$ )

**Compound 5f:** White solid (85%):  $^1\text{H}$  NMR:  $\delta_{\text{H}}$  2.75-2.77 (m, 2H), 3.31 (1H, d,  $J = 12.0$  Hz), 3.69 (3H, s), 4.24 (1H, d,  $J = 11.0$  Hz), 4.43-4.46 (1H, m), 4.79 (1H, d,  $J = 12.0$  Hz), 6.40 (1H, d,  $J = 7.5$  Hz, ArH), 6.53-6.59 (2H, m, ArH), 6.69-6.75 (2H, m, ArH), 6.79-6.83 (3H, m, ArH), 7.08-7.23

(8H, m, ArH), 7.40-7.42 (1H, dd,  $J = 8.0, 1.0$  Hz, ArH), 10.31 (1H, s, NH);  $^{13}\text{C}$  NMR:  $\delta/\text{ppm}$  39.2, 53.6, 61.3, 62.2, 70.7, 71.7, 109.1, 112.9, 117.1, 120.9, 121.1, 121.5, 126.3, 126.4, 127.7, 128.2, 128.5, 129.2, 129.5, 130.3, 135.9, 138.4, 139.9, 142.5, 159.9, 161.0, 179.6, 192.1; Mass  $m/z$ : 516 ( $\text{M}^+$ )

**Compound 5g:** Obtained as white solid (88%):  $^1\text{H}$  NMR (DMSO- $d_6$ , 500 MHz):  $\delta/\text{ppm}$  2.71-2.77 (m, 1H), 3.06 (d,  $J = 9.0$  Hz, 1H), 3.28 (d,  $J = 12.5$  Hz, 1H), 3.68, (s, 3H), 4.21 (d,  $J = 11.0$  Hz, 1H), 4.39-4.40 (m, 1H), 4.76 (d,  $J = 12.5$  Hz, 1H), 6.39 (d,  $J = 7.5$  Hz, 1H, ArH), 6.53-6.60 (m, 2H, ArH), 6.69-6.74 (m, 2H, ArH), 6.79-6.81 (m, 1H, ArH), 6.87 (d,  $J = 8.0$  Hz, 2H, ArH), 7.08-7.22 (m, 8H, ArH), 7.39-7.41 (dd,  $J = 8.0, 2.0$  Hz, 1H, ArH), 10.29 (s, 1H, NH);  $^{13}\text{C}$  NMR (DMSO- $d_6$ , 125 MHz):  $\delta/\text{ppm}$  39.7, 52.9, 55.5, 61.2, 70.5, 71.9, 109.1, 114.7, 117.1, 120.9, 121.1, 121.4, 126.3, 126.4, 127.7, 128.3, 128.4, 128.5, 129.5, 135.8, 140.0, 142.5, 158.9, 161.0, 179.6, 192.2; Mass  $m/z$ : 516 ( $\text{M}^+$ )

**Compound 5j:** Obtained as white solid (91%):  $^1\text{H}$  NMR (DMSO- $d_6$ , 400 MHz):  $\delta/\text{ppm}$  2.75-2.79 (m, 1H), 2.88-2.90 (m, 1H), 4.40 (d,  $J = 10.0$  Hz, 1H), 4.52-4.54 (m, 1H), 4.68 (d,  $J = 11.6$  Hz, 1H), 5.41-5.42 (m, 1H), 6.46 (d,  $J = 8.0$  Hz, 1H, ArH), 6.56-6.59 (m, 2H, ArH), 6.74-6.78 (m, 2H, ArH), 6.85 (t,  $J = 8.0$  Hz, 1H, ArH), 7.08-7.13 (m, 3H, ArH), 7.21-7.24 (m, 1H, ArH), 7.47-7.57 (m, 2H, ArH), 7.74-7.87 (m, 2H, ArH), 8.03 (d,  $J = 6.8$  Hz, 2H, ArH), 8.26-8.28 (m, 1H, ArH), 10.41 (s, 1H, NH);  $^{13}\text{C}$  NMR (DMSO- $d_6$ , 100 MHz):  $\delta/\text{ppm}$  39.5, 53.4, 61.3, 67.7, 70.7, 71.9, 109.4, 117.2, 118.6, 118.7, 121.1, 121.9, 122.7, 126.5, 128.0, 128.6, 129.8, 133.6, 134.8, 136.0, 136.1, 139.3, 139.5, 142.6, 148.4, 148.6, 161.2, 161.4, 179.6, 192.1; Mass  $m/z$ : 531 ( $\text{M}^+$ )
